# Supplementary material for: Serum miR-122-5p and miR-206 expression: non-invasive prognostic biomarkers for renal cell carcinoma
Source: PubMed Central journal article supplement (PMC5781339; doi:10.1186/s13148-018-0444-9), 2018-01-23

**Table S1. Small RNA Sequencing.** Differentially (p<0.05) expressed miRNAs in serum of RCC patients.

| <b>Upregulated in ccRCC</b> | <b>log2 FC</b> | <b>Downregulated in ccRCC</b> | <b>log2 FC</b> |
|-----------------------------|----------------|-------------------------------|----------------|
| hsa-miR-122-5p              | 0.88           | hsa-miR-206                   | -1.31          |
| hsa-miR-885-3p              | 0.85           | hsa-miR-1185-1-3p             | -0.72          |
| hsa-miR-193b-5p             | 0.78           | hsa-miR-499a-5p               | -0.70          |
| hsa-miR-450a-2-3p           | 0.75           | hsa-miR-485-3p                | -0.65          |
| hsa-miR-483-5p              | 0.62           | hsa-miR-125a-5p               | -0.61          |
| hsa-let-7f-1-3p             | 0.60           | hsa-miR-4446-3p               | -0.59          |
| hsa-miR-193a-5p             | 0.59           | hsa-miR-196b-5p               | -0.58          |
| hsa-miR-10b-3p              | 0.59           | hsa-miR-625-3p                | -0.53          |
| hsa-miR-18a-3p              | 0.58           | hsa-let-7i-5p                 | -0.50          |
| hsa-miR-582-3p              | 0.58           | hsa-miR-139-3p                | -0.48          |
| hsa-miR-150-3p              | 0.55           | hsa-miR-99b-5p                | -0.44          |
| hsa-miR-22-5p               | 0.54           | hsa-miR-1908-5p               | -0.40          |
| hsa-miR-194-5p              | 0.53           |                               |                |
| hsa-miR-148a-3p             | 0.52           |                               |                |
| hsa-miR-192-5p              | 0.46           |                               |                |
| hsa-miR-27a-3p              | 0.43           |                               |                |
| hsa-miR-142-5p              | 0.35           |                               |                |

**Table S2. Multivariate Cox regression analysis for miR-122-5p.**

Cut-off 5.89. Abbreviations: HR, hazard ratio; 95%CI, 95% confidence interval

|                                               | Overall Survival (OS) |               |         | Cancer Specific Survival (CSS) |                |         | Progression-free Survival (PFS) |              |         |
|-----------------------------------------------|-----------------------|---------------|---------|--------------------------------|----------------|---------|---------------------------------|--------------|---------|
|                                               | HR                    | (95% CI)      | p-value | HR                             | (95% CI)       | p-value | HR                              | (95% CI)     | p-value |
| <b>miR-122-5p, &gt;cut-off vs &lt;cut-off</b> | 5.04                  | 1.16 - 21.94  | 0.031   | 8.61                           | 1.56 - 47.44   | 0.013   | 2.34                            | 0.77 - 7.11  | 0.132   |
| <b>pT-stage, pT3-4 vs pT1-2</b>               | 0.11                  | 0.01 - 1.12   | 0.063   | 0.11                           | 0.01 - 1.22    | 0.072   | 2.68                            | 0.88 - 8.21  | 0.082   |
| <b>pN-stage pN1 vs pN0</b>                    | 6.49                  | 1.20 - 35.2   | 0.03    | 42.26                          | 1.38 - 1289.94 | 0.032   | 2.72                            | 0.49 - 15.11 | 0.252   |
| <b>M-stage, cM1 vs cM0</b>                    | 33.53                 | 1.28 - 876.06 | 0.035   | 7.36                           | 1.24 - 43.82   | 0.028   | 1.18                            | 0.34 - 3.88  | 0.787   |
| <b>Fuhrman-Grading, G3+4 vs G1+2</b>          | 1.44                  | 0.26 - 7.93   | 0.672   | 1.35                           | 0.23 - 8.07    | 0.74    | 1.65                            | 0.48 - 5.67  | 0.426   |

**Table S3. Multivariate Cox regression analysis for miR-206.** Cut-

off 2.787 for OS and CSS, Cut-off 2.382 for PFS. Abbreviations: HR, hazard ratio; 95%CI, 95% confidence interval

|                                               | Overall Survival (OS) |               |         | Cancer Specific Survival (CSS) |               |         | Progression-free Survival (PFS) |              |         |
|-----------------------------------------------|-----------------------|---------------|---------|--------------------------------|---------------|---------|---------------------------------|--------------|---------|
|                                               | HR                    | (95% CI)      | p-value | HR                             | (95% CI)      | p-value | HR                              | (95% CI)     | p-value |
| <b>miR-122-5p, &gt;cut-off vs &lt;cut-off</b> | 8.57                  | 1.91 - 38.38  | 0.005   | 13.14                          | 2.43 - 70.93  | 0.003   | 3.46                            | 1.13 - 10.68 | 0.030   |
| <b>pT-stage, pT3-4 vs pT1-2</b>               | 0.07                  | 0.01 - 0.82   | 0.034   | 0.05                           | 0.003 - 0.78  | 0.032   | 1.85                            | 0.58 - 5.92  | 0.300   |
| <b>pN-stage pN1 vs pN0</b>                    | 24.9                  | 1.18 - 525.18 | 0.039   | 26.22                          | 1.18 - 582.29 | 0.038   | 4.01                            | 0.68 - 23.72 | 0.125   |
| <b>M-stage, cM1 vs cM0</b>                    | 3.8                   | 0.84 - 17.18  | 0.082   | 4.62                           | 0.96 - 22.29  | 0.057   | 1.49                            | 0.44 - 5.01  | 0.521   |
| <b>Fuhrman-Grading, G3+4 vs G1+2</b>          | 5.75                  | 1.01 - 32.70  | 0.048   | 8.57                           | 1.23 - 59.69  | 0.030   | 1.48                            | 0.43 - 5.18  | 0.536   |

**Figure S1. Serum piRNA levels.** piRNA expression values were low in the 26 serum samples (A). piRNA uc032och.1 was significantly upregulated in serum of ccRCC patients (B).

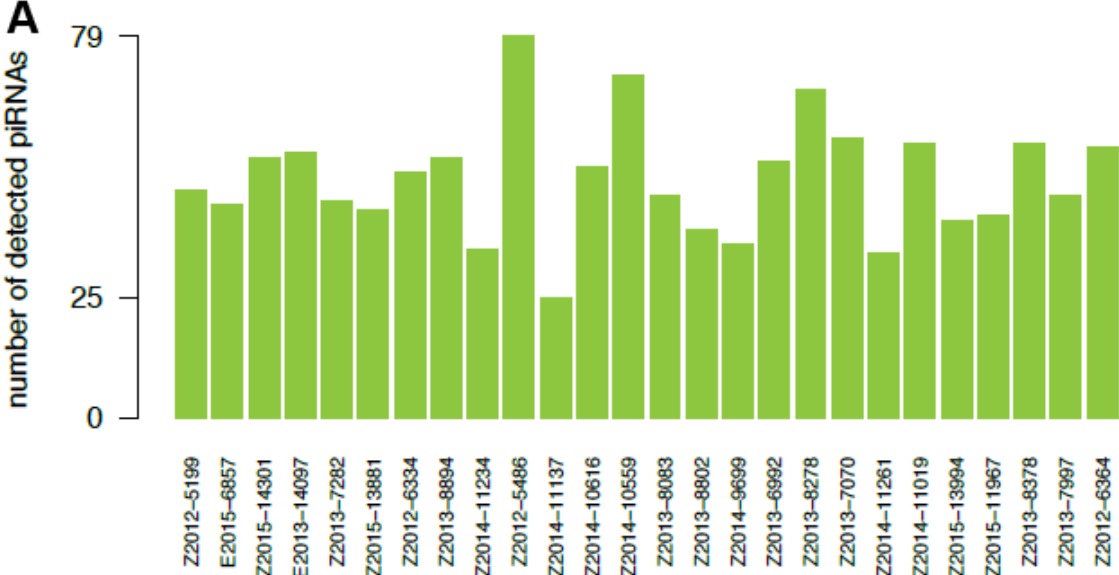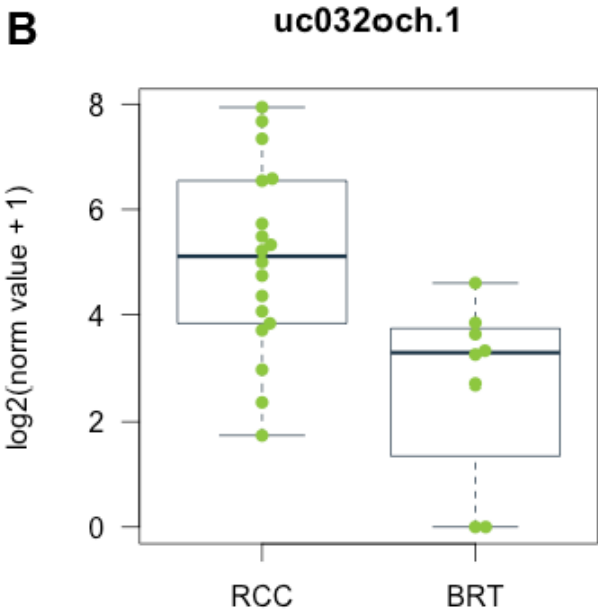

Supplement: 13148_2018_444_MOESM1_ESM.pdf [file 13148_2018_444_MOESM1_ESM.pdf]
